# Supplementary material
Source: PubMed Central journal article supplement (PMC6677388)
Supplement: NIHMS1511424-supplement-Supplementary_Tables_1__2__4.pdf [file NIHMS1511424-supplement-Supplementary_Tables_1__2__4.pdf]

**SUPPLEMENTARY TABLE 2**

Primers used for qPCR experiments in Figure 1 and Supplementary Figure 1.

| <b>Gene</b>   | <b>Forward primer</b>    | <b>Reverse primer</b>      |
|---------------|--------------------------|----------------------------|
| <i>BRACH</i>  | TATGAGCCTCGAATCCACATAGT  | CCTCGTTCTGATAAGCAGTCAC     |
| <i>FOXA2</i>  | AAAAAGCCTCCGGTTTCCAC     | TCCCTGCAACAACAGCAATG       |
| <i>FOXG1</i>  | AACCTGTGTTGCGCAAATGC     | AAACACGGGCATATGACCAC       |
| <i>GAPDH</i>  | CATGAGAAGTATGACAACAGCCT  | AGTCCTTCCACGATACCAAAGT     |
| <i>GSX2</i>   | ATGTCGCGCTCCTTCTATGTC    | ATGCCAAGCGGGATGAAGAAA      |
| <i>HOXB4</i>  | TCCTCGTTTTTCAGCTTTGGC    | TCATTTGTTAGCGGGTGTCTG      |
| <i>NKX2.1</i> | AGCACACGACTCCGTTCTC      | GCCCACTTTCTTGTAGCTTTCC     |
| <i>PAX6</i>   | TGGGCAGGTATTACGAGACTG    | ACTCCCGCTTATACTGGGCTA      |
| <i>RAX</i>    | GGCCATCCTGGGGTTTACC      | GGTCGAGGGGCTTCGTACT        |
| <i>SIX3</i>   | AGCAGAAGACGCATTGCTTC     | ACCAGTTGCCTACTTGTGTG       |
| <i>SOX2</i>   | TTCACATGTCCCAGCACTACCAGA | TCACATGTGTGAGAGGGGCAGTGTGC |
| <i>SOX17</i>  | GTGGACCGCACGGAATTTG      | GGAGATTCACACCGGAGTCA       |

**SUPPLEMENTARY TABLE 4**

List of genes used for clustering cells in single cell gene expression.

| #   | Gene     | #   | Gene          | #   | Gene      | #   | Gene     | #   | Gene    |
|-----|----------|-----|---------------|-----|-----------|-----|----------|-----|---------|
| 1   | ADCY1    | 41  | CELF4         | 81  | EGR1      | 121 | HSPA5    | 161 | MCM3    |
| 2   | ADRA2A   | 42  | CENPE         | 82  | EGR2      | 122 | HTR2C    | 162 | MCM4    |
| 3   | AGT      | 43  | CENPF         | 83  | EMX2      | 123 | ID2      | 163 | MDK     |
| 4   | AIFM3    | 44  | CENPW         | 84  | ENO1      | 124 | ID4      | 164 | MEF2C   |
| 5   | ALCAM    | 45  | CHGB          | 85  | ENPP6     | 125 | IFITM2   | 165 | MEG3    |
| 6   | ANXA2    | 46  | CHPF          | 86  | EOMES     | 126 | IFITM3   | 166 | MIR302B |
| 7   | APOD     | 47  | CKAP2L        | 87  | ERBB3     | 127 | IGDCC3   | 167 | MKI67   |
| 8   | AQP1     | 48  | CLDN11        | 88  | ESRG      | 128 | IGF1     | 168 | MLC1    |
| 9   | AQP4     | 49  | CLDN19        | 89  | EYA2      | 129 | IGFBP5   | 169 | MLF1IP  |
| 10  | ASIC4    | 50  | CLDN6         | 90  | FABP7     | 130 | IGFBP7   | 170 | MSX1    |
| 11  | ASPM     | 51  | CLIC6         | 91  | FAM107A   | 131 | INSM1    | 171 | MT3     |
| 12  | ATP1A2   | 52  | CLU           | 92  | FAM60A    | 132 | IRX2     | 172 | MX1     |
| 13  | AURKB    | 53  | CNTNAP2       | 93  | FAM64A    | 133 | ISG15    | 173 | MYBL2   |
| 14  | B2M      | 54  | COL11A1       | 94  | FAM89A    | 134 | ISL1     | 174 | NCAPG   |
| 15  | B3GAT2   | 55  | COL20A1       | 95  | FEZF2     | 135 | KCNJ13   | 175 | NDC80   |
| 16  | BCAN     | 56  | COLEC12       | 96  | FGF14     | 136 | KCTD8    | 176 | NDRG1   |
| 17  | BCAS1    | 57  | CP            | 97  | FGFR3     | 137 | KIAA0101 | 177 | NECAB1  |
| 18  | BCL11B   | 58  | CPNE6         | 98  | FOLR1     | 138 | KIF11    | 178 | NEFL    |
| 19  | BEX5     | 59  | CPXM2         | 99  | FOS       | 139 | KIF15    | 179 | NEFM    |
| 20  | BHLHE22  | 60  | CRABP1        | 100 | FOXM1     | 140 | KIFC1    | 180 | NEGR1   |
| 21  | BIRC5    | 61  | CRABP2        | 101 | FST       | 141 | KRT18    | 181 | NES     |
| 22  | BST2     | 62  | CRISP1D1      | 102 | FTL       | 142 | KRT8     | 182 | NEUROD1 |
| 23  | C1orf168 | 63  | CRYAB         | 103 | FXYD5     | 143 | L1TD1    | 183 | NEUROD2 |
| 24  | C1orf61  | 64  | CRYM          | 104 | FZD8      | 144 | LAMB1    | 184 | NEUROD6 |
| 25  | C22orf42 | 65  | CTSC          | 105 | GAD1      | 145 | LDHA     | 185 | NFIB    |
| 26  | CA2      | 66  | CXCL14        | 106 | GAP43     | 146 | LG11     | 186 | NHLH1   |
| 27  | CALB2    | 67  | DDIT4         | 107 | GINS2     | 147 | LHFPL3   | 187 | NHLH2   |
| 28  | CASC5    | 68  | DIRAS3        | 108 | GPM6B     | 148 | LHX2     | 188 | NMU     |
| 29  | CAV1     | 69  | DLGAP5        | 109 | GPR17     | 149 | LHX6     | 189 | NNAT    |
| 30  | CCK      | 70  | DLK1          | 110 | GTSE1     | 150 | LHX8     | 190 | NPAS3   |
| 31  | CCNB1    | 71  | DLL1          | 111 | GUCY1A3   | 151 | LIN28A   | 191 | NPAS4   |
| 32  | CCNB2    | 72  | DLX1          | 112 | H19       | 152 | LITAF    | 192 | NPC2    |
| 33  | CCND1    | 73  | DLX5          | 113 | HES5      | 153 | LMO3     | 193 | NPTX2   |
| 34  | CD9      | 74  | DLX6-AS1      | 114 | HES6      | 154 | LMO7     | 194 | NR6A1   |
| 35  | CDC20    | 75  | DMRTA2        | 115 | HIST1H2AC | 155 | LMX1A    | 195 | NRN1    |
| 36  | CDCA5    | 76  | DPPA4         | 116 | HIST1H4C  | 156 | LPL      | 196 | NSG2    |
| 37  | CDCA8    | 77  | EBF1          | 117 | HMG2      | 157 | MAG      | 197 | NTN1    |
| 38  | CDK1     | 78  | ECEL1         | 118 | HMG2      | 158 | MAP1B    | 198 | NTRK2   |
| 39  | CDKN1A   | 79  | EDNRB         | 119 | HOPX      | 159 | MAPT     | 199 | NTS     |
| 40  | CDKN1C   | 80  | EGRF          | 120 | HSD17B2   | 160 | MBP      | 200 | NUF2    |
|     |          |     |               |     |           |     |          |     |         |
| #   | Gene     | #   | Gene          | #   | Gene      | #   | Gene     | #   | Gene    |
| 201 | NUSAP1   | 241 | PTGDS         | 281 | SLC2A3    | 321 | TRH      |     |         |
| 202 | NXPH1    | 242 | PTN           | 282 | SLC32A1   | 322 | TRIM67   |     |         |
| 203 | OLFML3   | 243 | PTTG1         | 283 | SLC4A5    | 323 | TRIM71   |     |         |
| 204 | OLIG1    | 244 | QPRT          | 284 | SLIT2     | 324 | TRPM3    |     |         |
| 205 | OLIG2    | 245 | RAB13         | 285 | SMC2      | 325 | TSHZ2    |     |         |
| 206 | ONECUT2  | 246 | RAB31         | 286 | SMC4      | 326 | TTR      |     |         |
| 207 | ONECUT3  | 247 | RBM47         | 287 | SMOC1     | 327 | TTYH1    |     |         |
| 208 | OSTN     | 248 | RBPMS         | 288 | SOX10     | 328 | TUBA1B   |     |         |
| 209 | OTX2     | 249 | RELN          | 289 | SOX6      | 329 | TUBA1C   |     |         |
| 210 | PAX6     | 250 | RGS16         | 290 | SOX9      | 330 | UBE2C    |     |         |
| 211 | PBK      | 251 | RIT2          | 291 | SPARC     | 331 | VCAM1    |     |         |
| 212 | PBX3     | 252 | RP11-143M1.2  | 292 | SPARCL1   | 332 | VIM      |     |         |
| 213 | PCDH17   | 253 | RP11-395L14.4 | 293 | SPC25     | 333 | VSNL1    |     |         |
| 214 | PCNA     | 254 | RP11-397G17.1 | 294 | SPHKAP    | 334 | WLS      |     |         |
| 215 | PCP4     | 255 | RP11-82C23.2  | 295 | SPOCK2    | 335 | WNT7B    |     |         |
| 216 | PDGFRA   | 256 | RP11-93B14.5  | 296 | SPOCK3    | 336 | ZCCHC12  |     |         |
| 217 | PDYN     | 257 | RPS6          | 297 | SPON1     | 337 | ZFP36L1  |     |         |
| 218 | PGM2L1   | 258 | RRM2          | 298 | SST       | 338 | ZIC1     |     |         |
| 219 | PI15     | 259 | RSPO1         | 299 | STMN2     |     |          |     |         |
| 220 | PIFO     | 260 | RSPO2         | 300 | STMN4     |     |          |     |         |
| 221 | PLA2G16  | 261 | RSPO3         | 301 | SULF1     |     |          |     |         |
| 222 | PLK1     | 262 | RTN1          | 302 | SULF2     |     |          |     |         |
| 223 | PLOD2    | 263 | RUNX1T1       | 303 | SYT1      |     |          |     |         |
| 224 | PLP1     | 264 | S100B         | 304 | SYT4      |     |          |     |         |
| 225 | PLS3     | 265 | SAT1          | 305 | TAC3      |     |          |     |         |
| 226 | PLTP     | 266 | SCD           | 306 | TACC3     |     |          |     |         |
| 227 | PMCH     | 267 | SCG2          | 307 | TAGLN2    |     |          |     |         |
| 228 | PMP2     | 268 | SCG5          | 308 | TBR1      |     |          |     |         |
| 229 | PNP      | 269 | SCRG1         | 309 | TENM1     |     |          |     |         |
| 230 | PODXL    | 270 | SEMA5A        | 310 | TENM2     |     |          |     |         |
| 231 | POU2F2   | 271 | SERPINE2      | 311 | TF        |     |          |     |         |
| 232 | POU4F1   | 272 | SERPINF1      | 312 | THSD7A    |     |          |     |         |
| 233 | PPAP2B   | 273 | SERPINI1      | 313 | TIMP3     |     |          |     |         |
| 234 | PPP1R17  | 274 | SEZ6          | 314 | TNC       |     |          |     |         |
| 235 | PRC1     | 275 | SFRP1         | 315 | TNNT1     |     |          |     |         |
| 236 | PRDX6    | 276 | SIX3          | 316 | TOP2A     |     |          |     |         |
| 237 | PROX1    | 277 | SLA           | 317 | TPBG      |     |          |     |         |
| 238 | PRR11    | 278 | SLC13A4       | 318 | TPM1      |     |          |     |         |
| 239 | PRTG     | 279 | SLC17A7       | 319 | TPM2      |     |          |     |         |
| 240 | PTCH1    | 280 | SLC1A3        | 320 | TPX2      |     |          |     |         |
